# Supplementary material for: Cognitive Status of Nursing Postgraduates Toward Generative Artificial Intelligence: A Qualitative Study Based on the UTAUT Framework
Source: Research Square preprint supplement (doi:10.21203/rs.3.rs-7632348/v1), 2025-10-15
Supplement: Supplementary file 1 [file 71134c3d674781eb97700f5f.docx]

Interview Outline

Gender: Age: Grade: Clinical Internship Duration: Serial Number:

1. **Personal Characteristics**

Please briefly introduce the curriculum of your nursing major and the study stages you have completed.

II. **Cognition of Generative Artificial (GenAI) Intelligence**

1. How did you first learn about generative artificial intelligence?
2. Please share your understanding of the application of GenAI in the nursing field. What roles do you think it can play?

**III. Performance Expectancy and Effort Expectancy**

1. Do you think GenAI helps with your nursing knowledge learning? In what specific aspects?

2. Regarding the improvement of nursing skill operations, what role do you expect GenAI to play?

3. When using these GenAI tools, which function did you find easiest to master? What difficulties or challenges have you encountered?

4. What barriers do you think nursing undergraduates face in using GenAI?

5. What confusions or difficulties have you encountered during use?

6. How do you evaluate the practicality and effectiveness of the currently available GenAI tools? (You can give examples of different software.)

**IV. Attitudes and Behaviors Toward Usage (UTAUT Use Behavior)**

1. Have you used GenAI tools during your nursing studies? If yes, please elaborate on the software channels, scenarios, and frequency of use.

2. What motivated you to try using GenAI tools in nursing learning?

3. Would you actively recommend these GenAI tools to classmates or teachers? Why?

4. Do you think nursing students should take the initiative to use GenAI?

5. How do you think nursing students should respond to the changes brought by GenAI?

6. Are you willing to spend time learning the characteristics and commands of various GenAI tools?

7. How do you process the results generated by GenAI?

8. What is your perspective on the potential impact of using GenAI in nursing studies on independent thinking and innovative abilities?

**V. Social Influence**

1. What is the attitude of your classmates toward using GenAI in nursing studies?

2. Is the use of GenAI common among your classmates? Do they exchange usage experiences?

3. Does the opinion of your classmates on GenAI affect your own attitude? If so, how?

4. If GenAI is widely applied in nursing education, what impacts do you think it will have?

5. In your view, what position will GenAI occupy in future nursing career development?

6. From the perspective of future career development, how do you think the GenAI knowledge and applications encountered in classes will assist your performance in clinical internship and work?

7. Considering the current application of GenAI in nursing, what is your attitude toward introducing GenAI teaching in nursing education? Why?

**VI. Views on Applying GenAI in nursing education**

1. What resources or technical support do you think are needed to better apply GenAI in nursing education?

2. Does your school or teachers encourage you to use GenAI in nursing studies? Have they provided relevant guidance or training?

3. If you need to learn to use new GenAI teaching aids, what kind of training support do you expect from the school or teachers to ensure you can master it quickly?

4. What interaction methods do you hope the GenAI system used in future classes will have to help you get started easily?

5. Regarding the ethical and safety issues that may arise from GenAI applications in the nursing field, what concerns and opinions do you have?

**VII. Experience and Suggestion Sharing**

1. What unique experiences or skills have you gained from using GenAI to assist in nursing learning?

2. What suggestions do you have for other nursing students using GenAI tools?
